# Supplementary material for: Characterisation of Diabetic Ketoacidosis in Children and Adolescents with Type 1 Diabetes: A Regional Hospital Study
Source: Research Square preprint supplement (doi:10.21203/rs.3.rs-5928922/v1), 2025-04-01
Supplement: Supplementary file 1 [file edcff700b33e434f304a3f69.xlsx]

## Sheet: Sheet1
Subject Initials	Date of visit	DOB	Age in years	Age at diagnosis	Gender ( M 0, F1)	New 0, old 1	Duration of symtom(days)	Weight loss	Polydipsia	Drowsy/poorly responsive	Duration of DM (years)	Seen by another GP/doc	Hba1C at admission	pH at admission	HCO3 at admission	BE	Ket	Glucose at admission	DKA type	ED stay (hrs)	CCU admission (no 0, yes 1)	Dur of Insulin infusion (hours)	Time to pH recovery	Time to HCO3 recovery (hrs)	Precipitating illness (Y/N)	Type of illness	Resp swab result	If Resp Swab Pos	Urine result	If Urine Pos	CRP	Ab GAD	Ab IA2	Ab ZnT8	Complications	Weight Percentile	Height percentile	BMI percentile	Complications if pos	Follow-up age	Follow-up in years	HbA1c (mean over 1 year at last follow=up)	TDD (u/kg/d)	Insulin regime	Weight Kg	Weight Centile	Height cm	Height centile	BMI centile
JO	2022-12-10	2011-07-25	11	6	1	1	1						11.1	7.19	12.6		5	32	2	8	1	16	19	12	N																DNA
JO	2022-11-03	2011-07-25	11		1	1	2						11.1	7.25	13	-15.6	5.9	38	1	8	1	14	20	10	Y	3	0		0						1						DNA
JO	2022-05-24	2011-07-25	11		1	1	2						12.6	7.18	11		4.7	29	2	6	1	16	4	4	Y	3															DNA
JO	2022-02-18	2011-07-25	11		1	1								7.28	12.4		5.9	23.4	1	12	0	14	4	10	Y	3															DNA
PR	2022-10-13	2007-03-12	15	6	0	1	2				9.5			7.24	14.6	-11.5	6.7	11.4	1	6	1	2	10	2	N															15.9	2023-02-01	10.2	1.2	0		50		75
PR	2022-05-04	2007-03-12	15		0	1	2				9		10.2	7.153	9.9	-21.5	6.3	34	2	5	1	12	8	6	Y	4			0
MH	2022-08-31	2014-05-29	8	3	1	1					5			7.29	16.3		5.1	24.3	1	9	0	7																		9.5	2023-11-01	8.5	1.1	0	44.4	95		95
MH	2022-07-26	2014-05-29	8		1	1					5			7.25	16.3	-9.1	4.5	29	1	8	0	0	3	3	N
SS	2022-03-06	2007-10-03	15	12.5	0	1	1				3			7.29	16	-11.4	4.6	16.5	1	4	0	0	1	0	Y	3															nil
SS	2022-01-05	2007-10-03	15		0	1					3		13.7	7.26	18		4.9	25.7	1	7	0	6	16	0		3															nil
SS	2021-09-12	2007-10-03	14		0								16.1	7.26	14		3.9	26.1	1	4	0	7			N																nil
SS	2021-06-01	2007-10-03	14		0									7.25	15.9		4.2	54	1	2	1	12	1	0	N																nil
SS	2020-02-12	2007-10-03	13		0	0	7	1	1	1				7.09	9.6		7	30	3	5																					nil
SS	2020-06-03	2007-10-03	13		0	1								7.1	13		6.7	26.7	2	3	1																				nil
PM	2022-07-22	2016-09-07	6	5.8	1	0	7	1	1				11.1	7.27	18				1	19																				7	2023-09-01	6.9	0.7	1	28.9	90	81	90	75-90
RM	2022-07-01	2007-06-30	15	15	0	1	30	0	1	1				7.09	9.6	-19.3	5.9	32	3	10	0	18	19	11	N		0		0			0	0	1						16	2023-08-01	5.7	0.43	0	66.2	75	188.5	95
HB	2022-02-10	2019-11-18	3	2.3	0	0			1	1				7	6.5	-26	4.7	36	3	5	0																			4	2023-11-01		1	0	17.7	75	105.5	75
JL	2021-07-20	2009-10-01	12	12	1	0	14		1				15.8	7.08	9		5	33	3	8		17	16	9	N							1	0		1				5	12.5	2022-02-01		0.7	0		50		50
RC	2021-03-19	2007-04-11	14	12	0	0					2		14	7.28	17			20.6	1	9	0	0	0	2.5	N																DNA
HP	2020-09-10	2015-05-12	5	5.3	0	0	21		1					7.128	9.8		7.2	25.8	2	7	0	18	17	4	N							0								8	yes	8	0.8	0		75		75
JH	2020-08-20	2007-02-07	13	3	0	1	1				10			7	7			33.4	3	8	7	13	13	7	N										0					13.5	2020-09-01	7.2	0.73	1		95		95
RV	2019-09-30	2008-04-23	11	11	0	1								7.07	9		5.5	22	3	6	1	35	21	19	y	3			0						1						nil
SF	2019-07-12	2007-03-15	12	5	1	1					7			7.203	13.2	-13.3	5.5	36	1	21	1	26		15
SF	2019-07-12	2007-03-15	12		1	1					7			7.202	13		5.5	36	1	21		0	4	4																11.5	2018-08-01	11.3	1.3	0	50.4	75-90	157.5	90
SF	2018-05-08	2018-05-10	11		1	1		1	1	1	6		10.7	7.3	14.3		6.2	26	1	7	0	0	0	1
CD	2018-08-30	2005-11-23	13	11	1	1	4	-						7.08	11	-15.3	5	23.2	3	9	0	0	8	6	n															12	2018-07-01	8.3	1.2	0	53.6
IT	2018-05-14	2007-01-03	11	11	0	0	14	-	1	1				7.159	10.2	-18.6	5	33	2	10	1																			16	2023-10-01	10.3	1.8	0	68.9	25-50	178	75
LJ	2018-11-22	2004-11-24	14	9	1	1								7.19	12.9	-14.9	5.7	21.5	2	2	1	14	21	4	Y	tonsillitis														9	2013-12-01		1.2	0	34
AW	2018-02-17	2004-01-11	14	14	1	0	14		1	1		1		7.163	9.5		6.3	19.7	2	4	1	16	19	16																19	2023-07-01	6.8	0.9	0
RM	2019-04-25	2003-10-16	16	16	0	0	14	1	1	1			11.7	7.22	14.9		5.2	36	1	5	1	5	4	2	N															16.5	2020-10-01		0.4	0	59.9
			11.8667	8.88333									12.5545	7.18393	12.5833	-16.0455	5.48519	28.769		7.93333		10.72	10.3636	6.41304																12.1714		8.32	0.961429
			3.15937	4.38463									2.06318	0.0878502	3.16621	4.96032	0.860547	8.1395		4.84898		8.99315	7.79222	5.44111																4.28816		1.79245	0.374882
										only SC group
[truncated: 3 more columns]

## Sheet: Sheet2
Subject Initials	URN	Age in years	Gender	New 0, old 1	Duration of symtom(days)	Weight loss	Polydipsia	Drowsy/poorly responsive	Duration of DM (years)	Seen by another GP/Doc	Hba1C at admission	pH at admission	HCO3 at admission	Glucose at admission	DKA type	CCU admission	Dur of Insulin infusion (hours)	Time to pH recovery (hrs)	Time to HCO3 recovery (hrs)	Precipitating illness (Y/N)	Type of illness	Resp swab result	If Resp Swab Pos	Urine result	If Urine Pos	CRP	Antibody status ( at onset of diagnosis)	Complications	Complications if pos	Comments						Insulin regime				LOS (days)	ED stay hrs	First Disposition- ward/CCU	Comments
			M 0	New 0		No 0	No 0	No 0		No 0					0- Diabetic ketosis	No 0				No 0	Resp 1	Neg 0	SARS Cov 2- 1	Neg 0	E Coli- 1		Neg- 0	Neg 0	Line thrombophlebitis/extravasation-1							0-MDI						0-CCU
			F 1	Old 1		Yes 1	Yes 1	Yes 1		Yes 1					1- Mild DKA	Yes 1				Yes 1	UTI 2	Pos 1	RSV - 2	Pos 1	Others - 2		Pos for IA2 - 1	Pos- 1	ARF- 2							1- CSII						1-Ward
															2- Moderate DKA						GE 3		Influenza A/B - 3				Pos for Gad - 3		Requiring transfer to higher centre- 3
															3- Severe DKA						Others 4		Adeno - 4				Pos for both - 3		Hypokalemia < 3.0- 4
																							Rhino- 5						Hypophosphatemia- 5
																							Parainfluenza A/B - 6
																							Others- 7

## Sheet: Sheet3
	Subject Initials	Date of visit	DOB	Age in years	Gender ( M 0, F1)	New 0, old 1	Duration of symtom(days)	Weight loss	Polydipsia	Drowsy/poorly responsive	Duration of DM (years)	Seen by another GP/doc	Hba1C at admission	pH at admission	HCO3 at admission	BE	Ket	Glucose at admission	DKA type	ED stay (hrs)	CCU admission (no 0, yes 1)	Dur of Insulin infusion (hours)	Time to pH recovery	Time to HCO3 recovery (hrs)	Precipitating illness (Y/N)	Type of illness	Resp swab result	If Resp Swab Pos	Urine result	If Urine Pos	CRP	Ab GAD	Ab IA2	Ab ZnT8	Complications	Weight Percentile	Height percentile	BMI percentile	Complications if pos	Follow-up age	Follow-up in years	HbA1c (mean over 1 year at last follow=up)	TDD (u/kg/d)	Insulin regime	Weight Kg	Weight Centile	Height cm	Height centile	BMI centile
1	MH	2022-07-26	2014-05-29	8	1	1					5			7.25	16.3	-9.1	4.5	29	1	8	0	0	3	3	N
2	SS	2022-03-06	2007-10-03	15	0	1	1				3			7.29	16	-11.4	4.6	16.5	1	4	0	0	1	0	Y	3															nil
4	RC	2021-03-19	2007-04-11	14	0	0					2		14	7.28	17			20.6	1	9	0	0	0	2.5	N																DNA
5	SF	2019-07-11	2007-03-15	12	1	1					7			7.202	13		5.5	36	1	21		0	4	4																11.5	2018-08-01	11.3	1.3	0	50.4	75-90	157.5	90
6	SF	2018-05-08	2018-05-10	11	1	1		1	1	1	6		10.7	7.3	14.3		6.2	26	1	7	0	0	0	1
7	CD	2018-08-30	2005-11-23	13	1	1	4	-						7.08	11	-15.3	5	23.2	3	9	0	0	8	6	n															12	2018-07-01	8.3	1.2	0	53.6
Mean					5 girls	5 new T1d								7.23367	14.6					9.66667			2.66667	2.75
sds														0.0831905	2.28998					5.85377			3.07679	2.13892

																						7
3	PM	2022-07-22	2016-09-07	6	1	0	7	1	1				11.1	7.27	18				1	19	0	6																		7	2023-09-01	6.9	0.7	1	28.9	90	81	90	75-90
[truncated: 3 more columns]
